# Supplementary material for: Direct and Indirect Role of Migratory Birds in Spreading CCHFV and WNV: A Multidisciplinary Study on Three Stop-Over Islands in Italy
Source: MDPI journal article supplement (doi:10.3390/pathogens11091056), 2022-09-16
Supplement: s1 [file s1]

[illegible][illegible]

|    |                        |    |   |     |    |    |     |     |    |   |   |   |    |            |
|----|------------------------|----|---|-----|----|----|-----|-----|----|---|---|---|----|------------|
|    | Tree pipit             | 5  | 1 | 3   |    | 1  |     |     |    |   |   |   | 34 | 1          |
|    | Western yellow wagtail |    |   | 11  |    |    |     |     |    |   |   |   | 13 | 1          |
| SD | Great tit              |    |   |     |    |    |     |     |    |   |   |   | 1  |            |
|    | Eurasian skylark       |    |   |     |    |    | 1   |     |    |   |   |   |    |            |
|    | Chiff chaff            |    |   |     | 2  | 5  |     |     |    |   |   |   | 1  |            |
|    | Blackcap               |    |   |     |    | 2  |     |     |    |   |   |   | 1  |            |
|    | Sardinian warbler      |    |   |     |    | 3  | 1   |     |    |   |   |   |    |            |
|    | Song thrush            |    |   | 2   | 57 | 2  | 17  | 4   |    |   |   |   | 28 | 19         |
|    | Blackbird              |    |   |     | 4  | 13 | 3   |     |    |   |   |   | 11 |            |
|    | Ring ouzel             |    |   |     |    |    | 5   |     |    |   |   |   |    |            |
|    | European robin         |    |   |     | 22 | 17 | 102 | 22  |    |   |   |   | 3  | 227        |
|    | Black redstart         |    |   | 1   |    | 2  | 2   |     | 1  | 2 | 1 |   |    |            |
|    | Firecrest              |    |   |     |    |    |     |     |    |   |   |   | 1  |            |
|    | Hedge accentor         |    |   |     | 4  | 1  | 6   |     |    |   |   |   | 6  |            |
|    | Chaffinch              |    |   |     |    | 2  | 1   |     |    |   |   |   | 1  |            |
|    | Hawfinch               |    |   |     |    | 1  |     | 1   |    |   |   |   | 7  |            |
|    | Goldfinch              |    |   |     | 1  |    |     |     |    |   |   |   | 1  |            |
|    | Serin                  |    |   |     |    | 1  | 1   |     |    |   |   |   |    |            |
| R  | Italian sparrow        |    |   |     |    |    | 1   |     |    |   |   |   |    |            |
|    | TOTAL                  | 13 | 1 | 491 | 2  | 98 | 34  | 159 | 50 | 2 | 1 | 2 | 2  | 1208 279 2 |

Note: LD=long-distance migrant, SD=short-distance migrant, R=resident
